# Supplementary material for: Efficient open-air synthesis of Mg2+-doped CsPbI3 nanocrystals for high-performance red LEDs
Source: Royal Society of Chemistry journal article supplement (doi:10.1039/d4nr02005g), 2024-01-01
Supplement: d4nr02005g1.pdf [file d4nr02005g1.pdf]

## Efficient Open-Air Synthesis of $\text{Mg}^{2+}$ -Doped $\text{CsPbI}_3$ Nanocrystals for High-Performance Red LEDs

Jiaying Zheng,<sup>#,a</sup> Jiwei Ma,<sup>#,a</sup> Minghuai Yu,<sup>#,a</sup> Hao Xie,<sup>a</sup> Dongdong Yan,<sup>\*a</sup> Yihong Dong,<sup>a</sup> Yi Liu,<sup>a</sup>  
Xiaoyu Wang,<sup>a</sup> Weixiang Ye<sup>\*,a,b</sup>

<sup>a</sup>School of Physics and Optoelectronic Engineering, Hainan University, Haikou 570228, China.

<sup>b</sup>Center for Theoretical Physics, Hainan University, Haikou 570228, China.

\*E-mail: ddyan@hainanu.edu.cn; wxy@hainanu.edu.cn;

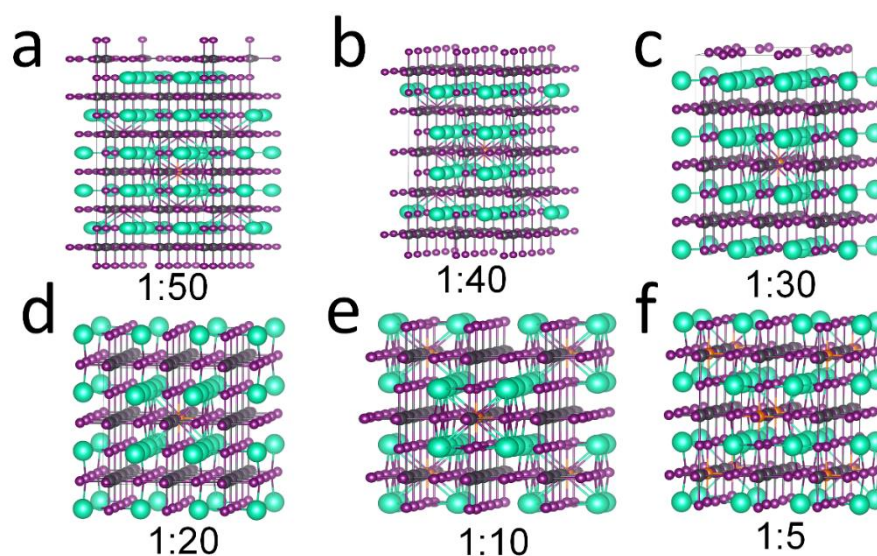

Fig. S1. Optimized crystal structures for  $\text{Pb}^{2+}$  ion was substituted by  $\text{Mg}^{2+}$  ion with an actual concentration of (a) 1/50, (b) 1/40, (c) 1/30, (d) 1/20, (d) 1/10, (e) 1/5

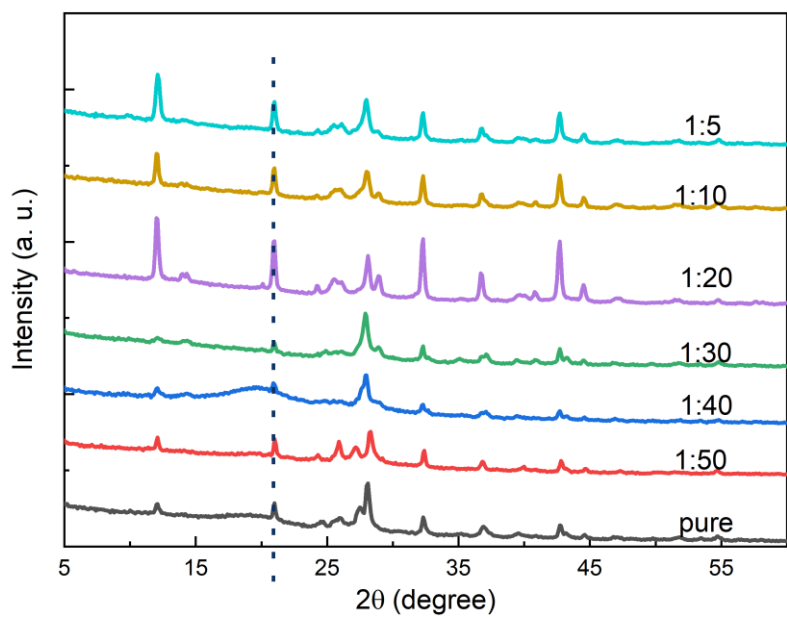

Fig. S2 XRD patterns of CsPbI<sub>3</sub> NCs with different doing ratio of Mg<sup>2+</sup> ion.

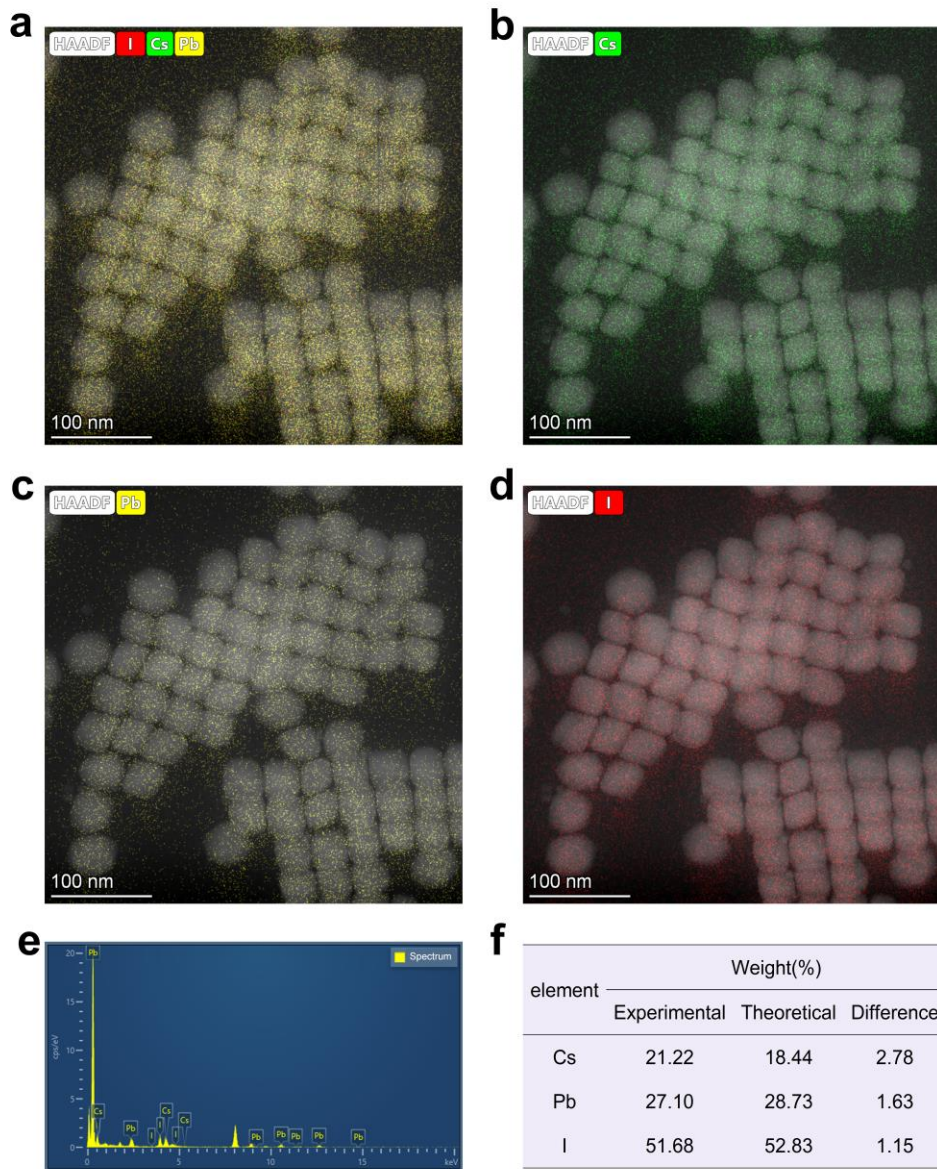

Fig. S3. HAADF image and EDS mapping for CsPbI<sub>3</sub> sample, a) All element, b) Cs, c) Pb, d) I element, (e) EDS spectrum, (f) element ratio of the EDS spectrum analysis.
